# Supplementary material
Source: Springer Nature journal article supplement (https://www.springermedizin.de/resource/supplementary/12885_2013_4893_MOESM10_ESM.pdf/9467592)
Supplement: MOESM10 [file 9467592]

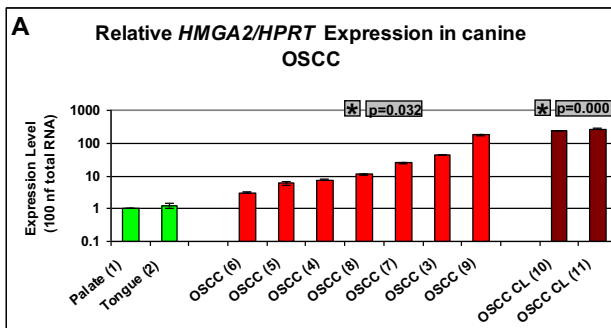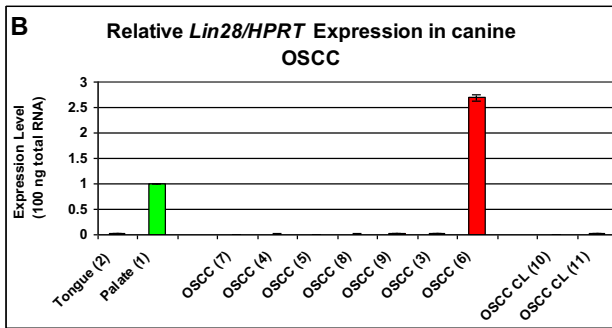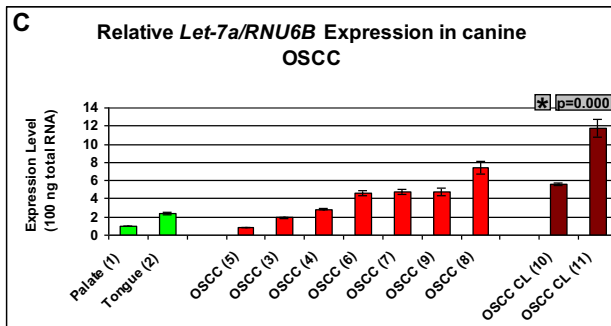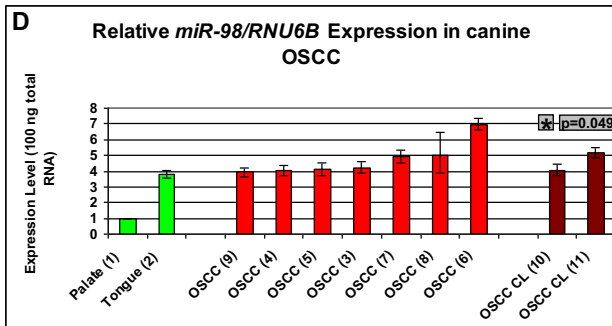

■ Non Neoplastic Control Sample 
 ■ Neoplastic Sample 
 ■ Cell Line, OSCC Derived 
 \* Statistically Significant Expression Deregulation
